# Supplementary material for: Financial Toxicity Among Chinese Cancer Families: A Qualitative Exploration of Multilevel Determinants and Public Health Implications
Source: Research Square preprint supplement (doi:10.21203/rs.3.rs-6232735/v1), 2025-04-09
Supplement: Supplementary file 1 [file 118be9b7d6a0899c83ce00ad.pdf]

Supplementary File 1

Semi-structured interview guide

---

1. What was your family's financial situation before you (your family) were diagnosed with cancer?
  2. What changes have occurred in your financial situation?
  3. How have the economic changes brought about by the disease impacted your work, life, and treatment?
  4. How have you been coping with these financial changes?
  5. What kind of financial support or resources have you received?
  6. What kind of support would you like to receive to help you deal with financial pressures?
-
